# Supplementary material for: Perceived Food Environments and Fruit &amp; Vegetable consumption among Hungarian single mothers
Source: Research Square preprint supplement (doi:10.21203/rs.3.rs-7290218/v1), 2025-09-02
Supplement: Supplementary file 1 [file 13482e87da383b0b479d8f15.docx]

Additional file 1

Title: Comparison of item formulation between the Hungarian NEMS-P and the original NEMS-P

|  | **Hungarian NEMS-P** | Scale | **Original NEMS-P (https://nems-upenn.org/wp-content/uploads/2018/10/NEMS-P-Survey.pdf)** | Scale |
| --- | --- | --- | --- | --- |
| n items | **Consumer Nutrition Environment** | | |  |
|  | How much do you agree with the following statements? | 1 -5 | Please mark whether you agree or disagree with the following statements: | 1-5 |
| 1 | There is a shop within walking distance where I can buy at least some varieties of fresh fruits and vegetables; |  | It is easy to buy fresh fruits and vegetables in my neighborhood. | 1-5 |
| 2 | Fresh fruits and vegetables within walking distance are of good quality |  | The fresh produce in my neighborhood is of high quality. | 1-5 |
| 3 | There is a wide choice of fresh fruits and vegetables in my area |  | There is a large selection of fresh fruits and vegetables in my neighbourhood. | 1-5 |
|  | Please think about the store where you buy the MOST food overall. How do you usually get to this shop? | 1-5 | Thinking about the store where you buy most of your food, how do you usually travel to this store? (check all that apply) | 1-6 |
| 4 | Choice of food |  | selection of foods |  |
| 5 | Food quality |  | Quality of foods |  |
| 6 | The general price level of food |  | Price of foods |  |
| 7 | In the place where you buy MOST groceries, how would you rate the prices of the following products? Fruit and Vegetable | 1-5 | At the store where you buy most of your food, how would you rate the price of fresh fruits and vegetables? | 1-4 |
|  | For the place where you buy MOST food, how typical are the following statements? (Unhealthy foods e.g. sweets, chips, sugary cereals and beverages, pastries, etc | 1-5 | Please mark whether you agree or disagree with the following statements for the store where you  buy most of your food and your shopping habits at that store. Questions about unhealthy foods   mean those foods often considered to be high in sugar, salt, fat and calories, such as candy,  chips, regular soda, sugary cereals, bakery  desserts, and so on. | 1-5 |
| 8 | Are there any advertisements or posters encouraging people to buy healthy foods |  | I notice signs that encourage me to purchase healthy foods |  |
| 9 | There are discounts or promotions on fruits and vegetables. |  | The unhealthy foods are usually located near the end of the aisles |  |
| 10 | I pay attention to the nutrition labelling or composition of packaged foods. |  | there are a lot of signs and displays encouraging me to buy unhealthy foods |  |
|  | **Community Nutrition Environment** | | |  |
| 11 | Please think about the store where you buy the MOST food overall. How do you usually get to this shop? | 1-6 | Thinking about the store where you buy most of your food, how do you usually travel to this store? (check all that apply) | 1-6 |
| 12 | Approximately how long would it take you to walk from your home to the shop where you buy MOST food? | 1-4 | About how long would it take to get from your home to the store where you buy most of your food, if you walked there? | 1-4 |
| 13 | How important are the following factors to you when deciding where to buy? | 1-5 | How important are each of the following factors in your decision to shop at the store where you buy most of your food? |  |
| 14 | Close to where I live |  | Near your home |  |
| 15 | Is it on the way or close to other places where you spend time |  | Near or on the way to other places where you spend time |  |
|  | **Home food environment** | | |  |
|  | How often do you find the following foods in your home? | 1-4 | In your home, how often do you…? |  |
| 16 | Vegetables exposed (in sight, within easy reach) |  | Have F&V in the refrigerator | 1-4 |
| 17 | Fresh vegetables in the fridge |  | Have fruit available in a bowl or on the counter |  |
| 18 | Fruits |  |  |  |
|  | **Psychosocial Factors** |  |  |  |
| 19 | How often in the last 12 months have you worried about whether you have enough money for nutritious meals? | 1-5 | In the last 12 months, how often were you concerned about having enough money to eat nutritious meals? | 1-4 |
| 20 | How concerned are you about the nutritional content of the food you eat (energy, protein, carbohydrates, fat or fibre)? | 1-4 | How concerned are you about the nutritional content of the foods you eat? | 1-4 |
|  | How important are the following factors for you when deciding what to buy? | 1-5 | When you shop for food, how important to you is...? | 1-3 |
| 21 | Taste related to the product |  | Taste |  |
| 22 | Presence of certain components |  | Nutrition |  |
| 23 | Nutrient content (energy, protein, carbohydrate, fat or fibre) |  | Cost |  |
| 24 | Price |  | Convenience |  |
| 25 | Favorite, well-known brand |  | Weight control |  |
| 26 | Organic/ecological origin |  |  |  |
| 27 | Food should be convenient, quick to prepare |  |  |  |
| 28 | Product should be made in Hungary |  |  |  |
| 29 | Should be a product made by small producers |  |  |  |
| 30 | It should be an environmentally friendly packaged (or packaging-free) product |  |  |  |
| 31 | Durable, long-lasting product |  |  |  |
|  | **Food consumption** |  |  |  |
|  | How often do you consume the following foods? | 1-6 |  |  |
| 32 | Fruit, other than fruit juices |  |  |  |
| 33 | Vegetables, other than potatoes and leaf-greens (lettuces) |  |  |  |
|  | **Background characteristics section** |  |  |  |
| 34 | How many people does your household have? | open | How many people live in your household other than you? We define household as anyone who lives in your home and shares most meals or food with you. | open |
| 35 | How many of these people work? | open |  |  |
| 36 | Number of children | open |  |  |
| 37 | Please specify your gender | 1-3 | Are you? Male Female | 1-2 |
| 38 | How old are you? | open | How old are you? | open |
| 39 | How tall are you (in centimetres)? | open | How tall are you without shoes | open |
| 40 | What is your weight (in kg)? | open | How much do you weigh without shoes | open |
| 41 | What is your labour market situation | 1-6 | How would you describe your current employment status? | open |
| 42 | Please indicate your highest level of education | 1-7 | What is your highest level of education? | 1-4 |
| 43 | How would you describe your health status? | 1-5 | In general, would you say your health is: | 1-5 |

Additional material 2

Title: Items description, factor loading, composite reliability (CR), average variance extracted (AVE) of the six latent variables and Cronbach's alpha(α) of the four composite constructs: Home Food environment; Consumer nutrition environment; Community Nutrition Environment; Psychosocial factors.

| Composite item/ Latent variables | α | Survey item(s) | Item range | No. of items | Factor loading | CR | AVE |
| --- | --- | --- | --- | --- | --- | --- | --- |
| **Home Food Environment** | | | | | | | |
| 1) Availability of fruits in the home | **0.772** | How often do you find the following foods in your home? - Fruits | 1-4 | 1 | - | - | - |
| 2) Accessibility of vegetables in the home | How often do you find the following foods in your home? - Vegetables exposed (in sight, within easy reach) | 1-4 | 2 | 0.8629*** | 0.664 | 0.497 |
| Fresh vegetables in the fridge | 1-4 | 0.8629*** |
| **Consumer Nutrition Environment** | | | | | | | |
| 1) Availability of fruits and vegetable | **0.657** | How much do you agree with the following statements? | | | | | |
| There is a shop within walking distance where I can buy at least some varieties of fresh fruits and vegetables; | 1-5 | 3 | 0.8778*** | 0.928 | 0.810 |
| Fresh fruits and vegetables within walking distance are of good quality | 1-5 | 0.9443*** |
| There is a wide choice of fresh fruits and vegetables in my area | 1-5 | 0.8763*** |
| 2) Store Motivation | How important are the following factors to you when deciding where to buy? | | | | | |
| Choice of food | 1-5 | 3 | 0.8719*** | 0.905 | 0.761 |
| Food quality | 1-5 | 0.8852*** |
| The general price level of food | 1-5 | 0.8588*** |
| 3) Affordability | In the place where you buy MOST groceries, how would you rate the prices of the following products? -Fruits and Vegetables | 1-5 | 1 | - | - | - |
| 4) Placement/ promotion of healthy items and nutrition information | For the place where you buy MOST food, how typical are the following statements? (Unhealthy foods e.g. sweets, chips, sugary cereals and beverages, pastries, etc | | | | | |
| Are there any advertisements or posters encouraging people to buy healthy foods | 1-5 | 3 | 0.7663*** | 0.854 | 0.661 |
| There are discounts or promotions on fruits and vegetables. | 1-5 | 0.8052*** |
| I pay attention to the nutrition labeling or composition of packaged foods. | 1-5 | 0.4865*** |
| **Community Nutrition Environment** | | | | | | | |
| 1) Store Access | **0.402** | How important are the following factors to you when deciding where to buy? |  | 2 |  | 0.717 | 0.559 |
| Close to where I live | 1-5 | 0.9158*** |
| Is it on the way or close to other places where you spend time | 1-5 | 0.9158*** |
| 2) Mode of travel | Please think about the store where you buy the MOST food overall. How do you usually get to this shop? | 1-6 | 1 | n.a. |  |  |
| 3) Distance traveled from home | Approximately how long would it take you to walk from your home to the shop where you buy MOST food? | 1-4 | 1 | n.a. |  |  |
| **Psychosocial factors** | | | | | | | |
| 1) Food insecurity | **0.792** | How often in the last 12 months have you worried about whether you have enough money for nutritious meals? | 1-5 | 1 |  |  |  |
| 2) Perception of nutrition importance | How concerned are you about the nutritional content of the food you eat (energy, protein, carbohydrates, fat or fibre)? | 1-4 | 1 |  |  |  |
| 3) Food motivation | How important are the following factors for you when deciding what to buy? | 1-4 | 11 |  | 0.950 | 0.658 |
| Taste related to the product | 1-4 | 0.8113*** |
| Presence of certain components | 1-4 | 0.7858*** |
| Nutrient content (energy, protein, carbohydrate, fat or fibre) | 1-4 | 0.8110*** |
| Price | 1-4 | 0.7953*** |
| Favorite, well-known brand | 1-4 | 0.8517*** |
| Organic/ecological origin | 1-4 | 0.8836*** |
| Food should be convenient, quick to prepare | 1-4 | 0.7364*** |
| Product should be made in Hungary | 1-4 | 0.7715*** |
| Should be a product made by small producers | 1-4 | 0.7726*** |
| It should be an environmentally friendly packaged (or packaging-free) product | 1-4 | 0.8751*** |
| Durable, long-lasting product | 1-4 | 0.6559*** |

*** = p < 0.001, ** = p < 0.01, * = p < 0.05
